# Supplementary material
Source: publisher figshare collection journal article supplement (https://acs.figshare.com/ndownloader/files/4376608)
Supplement: Supplementary file 1 [file 4376608]

 
data_1 
 
_audit_creation_method            SHELXL-97 
_chemical_name_systematic 
; 
 ? 
; 
_chemical_name_common             ? 
_chemical_melting_point           ? 
_chemical_formula_moiety          ? 
_chemical_formula_sum 
 'C44 H32 Ce5 N7 O35 S2' 
_chemical_formula_weight          1983.49 
 
loop_ 
 _atom_type_symbol 
 _atom_type_description 
 _atom_type_scat_dispersion_real 
 _atom_type_scat_dispersion_imag 
 _atom_type_scat_source 
 'C'  'C'   0.0033   0.0016 
 'International Tables Vol C Tables 4.2.6.8 and 6.1.1.4' 
 'N'  'N'   0.0061   0.0033 
 'International Tables Vol C Tables 4.2.6.8 and 6.1.1.4' 
 'O'  'O'   0.0106   0.0060 
 'International Tables Vol C Tables 4.2.6.8 and 6.1.1.4' 
 'S'  'S'   0.1246   0.1234 
 'International Tables Vol C Tables 4.2.6.8 and 6.1.1.4' 
 'Ce'  'Ce'  -0.2486   2.6331 
 'International Tables Vol C Tables 4.2.6.8 and 6.1.1.4' 
 'H'  'H'   0.0000   0.0000 
 'International Tables Vol C Tables 4.2.6.8 and 6.1.1.4' 
 
_symmetry_cell_setting            'Triclinic' 
_symmetry_space_group_name_H-M    'P-1' 
 
loop_ 
 _symmetry_equiv_pos_as_xyz 
 'x, y, z' 
 '-x, -y, -z' 
 
_cell_length_a                    10.701(7) 
_cell_length_b                    10.737(7) 
_cell_length_c                    27.233(17) 
_cell_angle_alpha                 95.068(8) 
_cell_angle_beta                  101.078(5) 
_cell_angle_gamma                 103.937(9) 
_cell_volume                      2950(3) 
_cell_formula_units_Z             2 
_cell_measurement_temperature     293(2) 
_cell_measurement_reflns_used     7934 
_cell_measurement_theta_min       2.0103 
_cell_measurement_theta_max       27.4548 
 
_exptl_crystal_description        'Prism' 
_exptl_crystal_colour             'Yellow' 
_exptl_crystal_size_max           0.1000 
_exptl_crystal_size_mid           0.0800 
_exptl_crystal_size_min           0.0800 
_exptl_crystal_density_meas       ? 
_exptl_crystal_density_diffrn     2.233 
_exptl_crystal_density_method     'not measured' 
_exptl_crystal_F_000              1894 
_exptl_absorpt_coefficient_mu     3.956 
_exptl_absorpt_correction_type    'Multi-scan' 
_exptl_absorpt_correction_T_min   0.691 
_exptl_absorpt_correction_T_max   0.729 
_exptl_absorpt_process_details    'SADABS (Sheldrick, 1996)' 
 
_exptl_special_details 
; 
 ? 
; 
 
_diffrn_ambient_temperature       293(2) 
_diffrn_radiation_wavelength      0.71073 
_diffrn_radiation_type            MoK\a 
_diffrn_radiation_source          'fine-focus sealed tube' 
_diffrn_radiation_monochromator   graphite 
_diffrn_measurement_device_type   'SCXmini CCD' 
_diffrn_measurement_method        'CCD_Profile_fitting'  
_diffrn_detector_area_resol_mean  ? 
_diffrn_standards_number          none  
_diffrn_standards_interval_count  none  
_diffrn_standards_interval_time   none  
_diffrn_standards_decay_%         none  
_diffrn_reflns_number             22731 
_diffrn_reflns_av_R_equivalents   0.0549 
_diffrn_reflns_av_sigmaI/netI     0.0846 
_diffrn_reflns_limit_h_min        -13 
_diffrn_reflns_limit_h_max        13 
_diffrn_reflns_limit_k_min        -13 
_diffrn_reflns_limit_k_max        13 
_diffrn_reflns_limit_l_min        -35 
_diffrn_reflns_limit_l_max        35 
_diffrn_reflns_theta_min          2.01 
_diffrn_reflns_theta_max          27.46 
_reflns_number_total              12887 
_reflns_number_gt                 9357 
_reflns_threshold_expression      >2sigma(I) 
 
_computing_data_collection        'CrystalClear (Rigaku Corp., 2000)'  
_computing_cell_refinement        'CrystalClear (Rigaku Corp., 2000)' 
_computing_data_reduction         'CrystalClear (Rigaku Corp., 2000)' 
_computing_structure_solution     'SHELXS-97 (Sheldrick, 1990)' 
_computing_structure_refinement   'SHELXL-97 (Sheldrick, 1997)' 
_computing_molecular_graphics     'SHELXTL' 
_computing_publication_material   'SHELXTL' 
 
_refine_special_details 
; 
 Refinement of F^2^ against ALL reflections.  The weighted R-factor wR and 
 goodness of fit S are based on F^2^, conventional R-factors R are based 
 on F, with F set to zero for negative F^2^. The threshold expression of 
 F^2^ > 2sigma(F^2^) is used only for calculating R-factors(gt) etc. and is 
 not relevant to the choice of reflections for refinement.  R-factors based 
 on F^2^ are statistically about twice as large as those based on F, and R- 
 factors based on ALL data will be even larger. 
; 
 
_refine_ls_structure_factor_coef  Fsqd  
_refine_ls_matrix_type            full 
_refine_ls_weighting_scheme       calc  
_refine_ls_weighting_details 
 'calc w=1/[\s^2^(Fo^2^)+(0.1299P)^2^+9.9803P] where P=(Fo^2^+2Fc^2^)/3' 
_atom_sites_solution_primary      direct 
_atom_sites_solution_secondary    difmap 
_atom_sites_solution_hydrogens    geom 
_refine_ls_hydrogen_treatment     constr 
_refine_ls_extinction_method      SHELXL 
_refine_ls_extinction_coef        0.0036(3) 
_refine_ls_extinction_expression 
 'Fc^*^=kFc[1+0.001xFc^2^\l^3^/sin(2\q)]^-1/4^' 
_refine_ls_number_reflns          12887 
_refine_ls_number_parameters      828 
_refine_ls_number_restraints      0 
_refine_ls_R_factor_all           0.1047 
_refine_ls_R_factor_gt            0.0757 
_refine_ls_wR_factor_ref          0.2287 
_refine_ls_wR_factor_gt           0.1974 
_refine_ls_goodness_of_fit_ref    1.085 
_refine_ls_restrained_S_all       1.085 
_refine_ls_shift/su_max           0.001 
_refine_ls_shift/su_mean          0.000 
 
loop_ 
 _atom_site_label 
 _atom_site_type_symbol 
 _atom_site_fract_x 
 _atom_site_fract_y 
 _atom_site_fract_z 
 _atom_site_U_iso_or_equiv 
 _atom_site_adp_type 
 _atom_site_occupancy 
 _atom_site_symmetry_multiplicity 
 _atom_site_calc_flag 
 _atom_site_refinement_flags 
 _atom_site_disorder_assembly 
 _atom_site_disorder_group 
Ce1 Ce 0.74776(6) 0.86853(6) 0.40414(2) 0.02579(18) Uani 1 1 d . . . 
Ce2 Ce 0.57310(6) 0.89998(6) 0.55647(2) 0.02631(19) Uani 1 1 d . . . 
Ce3 Ce 0.46491(7) 0.70884(7) 0.74963(2) 0.0315(2) Uani 1 1 d . . . 
Ce4 Ce 0.84735(6) 1.01836(6) 0.94274(2) 0.02591(19) Uani 1 1 d . . . 
Ce5 Ce 0.95614(6) 1.33880(6) 1.09334(2) 0.02569(18) Uani 1 1 d . . . 
S1 S 0.2603(3) 0.8396(3) 0.51132(11) 0.0275(6) Uani 1 1 d . . . 
S2 S 0.8271(3) 0.7507(3) 0.98892(11) 0.0276(6) Uani 1 1 d . . . 
O1 O 0.6748(9) 0.6381(8) 0.4336(3) 0.038(2) Uani 1 1 d . . . 
O2 O 0.6232(8) 0.7953(8) 0.4776(3) 0.0308(18) Uani 1 1 d . . . 
O3 O 0.5727(10) 0.8083(9) 0.6353(3) 0.042(2) Uani 1 1 d . . . 
O4 O 0.5723(11) 0.6464(10) 0.6809(3) 0.048(2) Uani 1 1 d . . . 
O5 O 0.3700(8) 0.9194(8) 0.4895(3) 0.0327(18) Uani 1 1 d . . . 
O6 O 0.3304(7) 0.7729(8) 0.5481(3) 0.0311(18) Uani 1 1 d . . . 
O7 O 0.1583(8) 0.7522(9) 0.4711(4) 0.043(2) Uani 1 1 d . . . 
O8 O 0.2017(8) 0.9298(8) 0.5371(3) 0.0338(19) Uani 1 1 d . . . 
O9 O 0.8222(8) 0.9293(8) 0.5722(3) 0.036(2) Uani 1 1 d . . . 
O10 O 1.0281(8) 1.0425(10) 0.6058(4) 0.046(2) Uani 1 1 d . . . 
O11 O 0.4715(8) 1.0523(8) 0.6019(3) 0.0311(18) Uani 1 1 d . . . 
O12 O 0.4806(8) 1.2287(8) 0.6531(3) 0.037(2) Uani 1 1 d . . . 
O13 O 0.3822(10) 0.8873(10) 0.7119(4) 0.050(3) Uani 1 1 d . . . 
O14 O 0.2547(10) 0.9676(9) 0.6548(4) 0.045(2) Uani 1 1 d . . . 
O15 O 0.3609(10) 0.4680(9) 0.7162(4) 0.047(2) Uani 1 1 d . . . 
O16 O 0.2334(9) 0.3039(8) 0.6571(4) 0.040(2) Uani 1 1 d . . . 
O17 O 0.2606(8) 0.6428(10) 0.7840(3) 0.041(2) Uani 1 1 d . . . 
O18 O 0.1575(9) 0.5844(8) 0.8458(3) 0.036(2) Uani 1 1 d . . . 
O19 O 0.6837(10) 0.6636(11) 0.7873(4) 0.051(3) Uani 1 1 d . . . 
O20 O 0.8240(9) 0.6024(9) 0.8457(4) 0.045(2) Uani 1 1 d . . . 
O21 O 0.4723(9) 0.8804(9) 0.8195(3) 0.044(2) Uani 1 1 d . . . 
O22 O 0.6818(9) 0.9403(10) 0.8629(3) 0.044(2) Uani 1 1 d . . . 
O23 O 0.8176(8) 1.1448(8) 1.0208(3) 0.0309(18) Uani 1 1 d . . . 
O24 O 0.6973(9) 1.2369(9) 1.0638(3) 0.038(2) Uani 1 1 d . . . 
O25 O 0.8609(9) 1.2512(8) 0.9260(3) 0.038(2) Uani 1 1 d . . . 
O26 O 0.9510(9) 1.4280(8) 0.8968(4) 0.039(2) Uani 1 1 d . . . 
O27 O 0.9622(8) 0.8743(8) 0.8989(3) 0.0335(19) Uani 1 1 d . . . 
O28 O 1.0812(9) 0.8296(8) 0.8444(3) 0.039(2) Uani 1 1 d . . . 
O29 O 0.9268(8) 0.8804(8) 1.0108(3) 0.0292(17) Uani 1 1 d . . . 
O30 O 0.7268(7) 0.7850(8) 0.9504(3) 0.0338(19) Uani 1 1 d . . . 
O31 O 0.8965(8) 0.6665(8) 0.9647(3) 0.0346(19) Uani 1 1 d . . . 
O32 O 0.7737(9) 0.6920(9) 1.0286(4) 0.043(2) Uani 1 1 d . . . 
O33 O 0.9121(8) 0.8448(9) 0.4842(3) 0.041(2) Uani 1 1 d . . . 
H33A H 0.8665 0.8511 0.5062 0.049 Uiso 1 1 d R . . 
H33B H 0.9018 0.7646 0.4749 0.049 Uiso 1 1 d R . . 
O34 O 0.6736(12) 0.9117(12) 0.7495(5) 0.076(4) Uani 1 1 d . . . 
H34A H 0.6358 0.9582 0.7313 0.092 Uiso 1 1 d R . . 
H34B H 0.6865 0.9446 0.7802 0.092 Uiso 1 1 d R . . 
O35 O 0.8574(9) 1.4233(8) 1.0122(3) 0.039(2) Uani 1 1 d . . . 
H35A H 0.8615 1.3676 0.9888 0.047 Uiso 1 1 d R . . 
H35B H 0.8400 1.3837 1.0368 0.047 Uiso 1 1 d R . . 
N1 N 0.6153(9) 0.6738(9) 0.5577(4) 0.028(2) Uani 1 1 d . . . 
N2 N 0.7303(9) 1.0887(9) 0.6264(4) 0.027(2) Uani 1 1 d . . . 
N3 N 0.2675(11) 0.6433(10) 0.6688(4) 0.035(2) Uani 1 1 d . . . 
N4 N 0.4842(11) 0.5985(11) 0.8315(4) 0.039(2) Uani 1 1 d . . . 
N5 N 0.6170(9) 1.0556(10) 0.9415(4) 0.030(2) Uani 1 1 d . . . 
N6 N 0.9761(10) 1.1104(9) 0.8747(4) 0.028(2) Uani 1 1 d . . . 
N7 N 0.9102(8) 0.7287(8) 0.7469(3) 0.100(6) Uiso 1 1 d . . . 
H7A H 0.9688 0.7693 0.7755 0.120 Uiso 1 1 calc R . . 
H7B H 0.8298 0.7108 0.7543 0.120 Uiso 1 1 calc R . . 
C1 C 0.6465(8) 0.6144(8) 0.5180(3) 0.029(2) Uani 1 1 d R . . 
C2 C 0.6818(8) 0.4946(8) 0.5196(3) 0.035(3) Uani 1 1 d R . . 
H2A H 0.7060 0.4558 0.4923 0.042 Uiso 1 1 calc R . . 
C3 C 0.6788(12) 0.4379(13) 0.5635(5) 0.037(3) Uani 1 1 d . . . 
H3A H 0.6996 0.3591 0.5659 0.044 Uiso 1 1 calc R . . 
C4 C 0.6445(12) 0.4997(12) 0.6036(5) 0.036(3) Uani 1 1 d . . . 
H4A H 0.6411 0.4623 0.6330 0.043 Uiso 1 1 calc R . . 
C5 C 0.6152(12) 0.6187(14) 0.5996(5) 0.036(3) Uani 1 1 d . . . 
C6 C 0.6489(11) 0.6854(12) 0.4726(5) 0.029(2) Uani 1 1 d . . . 
C7 C 0.5818(12) 0.6963(13) 0.6416(4) 0.033(3) Uani 1 1 d . . . 
C8 C 0.8598(11) 1.1025(13) 0.6369(5) 0.033(3) Uani 1 1 d . . . 
C9 C 0.9443(13) 1.1955(16) 0.6752(5) 0.049(4) Uani 1 1 d . . . 
H9A H 1.0348 1.2045 0.6816 0.059 Uiso 1 1 calc R . . 
C10 C 0.8938(14) 1.2731(17) 0.7032(7) 0.062(5) Uani 1 1 d . . . 
H10A H 0.9490 1.3335 0.7299 0.074 Uiso 1 1 calc R . . 
C11 C 0.7546(14) 1.2615(16) 0.6915(6) 0.052(4) Uani 1 1 d . . . 
H11A H 0.7169 1.3151 0.7093 0.062 Uiso 1 1 calc R . . 
C12 C 0.6815(10) 1.1689(12) 0.6533(4) 0.030(3) Uani 1 1 d . . . 
C13 C 0.9078(11) 1.0187(12) 0.6028(5) 0.031(3) Uani 1 1 d . . . 
C14 C 0.5351(11) 1.1497(12) 0.6355(4) 0.028(2) Uani 1 1 d . . . 
C15 C 0.2173(12) 0.7378(13) 0.6480(5) 0.039(3) Uani 1 1 d . . . 
C16 C 0.1054(12) 0.7095(14) 0.6079(5) 0.038(3) Uani 1 1 d . . . 
H16A H 0.0692 0.7742 0.5956 0.046 Uiso 1 1 calc R . . 
C17 C 0.0505(13) 0.5766(17) 0.5872(6) 0.050(4) Uani 1 1 d . . . 
H17A H -0.0218 0.5535 0.5600 0.061 Uiso 1 1 calc R . . 
C19 C 0.2112(12) 0.5192(11) 0.6496(5) 0.032(3) Uani 1 1 d . . . 
C18 C 0.1036(13) 0.4804(15) 0.6072(5) 0.048(4) Uani 1 1 d . . . 
H18A H 0.0694 0.3938 0.5931 0.058 Uiso 1 1 calc R . . 
C20 C 0.2889(13) 0.8723(13) 0.6731(5) 0.040(3) Uani 1 1 d . . . 
C21 C 0.2733(12) 0.4217(12) 0.6761(5) 0.033(3) Uani 1 1 d . . . 
C22 C 0.3765(13) 0.5649(12) 0.8521(5) 0.035(3) Uani 1 1 d . . . 
C23 C 0.3778(15) 0.5025(13) 0.8955(5) 0.045(3) Uani 1 1 d . . . 
H23A H 0.3054 0.4856 0.9104 0.053 Uiso 1 1 calc R . . 
C24 C 0.4928(17) 0.4674(15) 0.9150(6) 0.055(4) Uani 1 1 d . . . 
H24A H 0.4957 0.4230 0.9429 0.066 Uiso 1 1 calc R . . 
C25 C 0.6054(15) 0.4974(14) 0.8936(5) 0.050(4) Uani 1 1 d . . . 
H25A H 0.6806 0.4710 0.9060 0.060 Uiso 1 1 calc R . . 
C26 C 0.5980(12) 0.5703(12) 0.8519(5) 0.035(3) Uani 1 1 d . . . 
C27 C 0.2568(13) 0.6039(12) 0.8260(5) 0.037(3) Uani 1 1 d . . . 
C28 C 0.7132(12) 0.6186(12) 0.8279(5) 0.032(3) Uani 1 1 d . . . 
C29 C 0.5236(13) 1.0111(11) 0.8987(4) 0.029(2) Uani 1 1 d . . . 
C30 C 0.3990(14) 1.0365(15) 0.8922(5) 0.045(3) Uani 1 1 d . . . 
H30A H 0.3347 1.0034 0.8626 0.054 Uiso 1 1 calc R . . 
C31 C 0.3754(12) 1.1143(13) 0.9321(5) 0.041(3) Uani 1 1 d . . . 
H31A H 0.2951 1.1353 0.9290 0.050 Uiso 1 1 calc R . . 
C32 C 0.4758(13) 1.1605(14) 0.9773(5) 0.040(3) Uani 1 1 d . . . 
H32A H 0.4615 1.2103 1.0043 0.048 Uiso 1 1 calc R . . 
C33 C 0.5961(11) 1.1290(12) 0.9798(5) 0.030(2) Uani 1 1 d . . . 
C34 C 0.5584(12) 0.9351(12) 0.8569(5) 0.036(3) Uani 1 1 d . . . 
C35 C 0.7094(11) 1.1721(11) 1.0254(5) 0.031(3) Uani 1 1 d . . . 
C36 C 0.9910(12) 1.2324(11) 0.8666(4) 0.029(2) Uani 1 1 d . . . 
C37 C 1.0584(17) 1.2846(14) 0.8322(5) 0.051(4) Uani 1 1 d . . . 
H37A H 1.0638 1.3698 0.8267 0.061 Uiso 1 1 calc R . . 
C38 C 1.1198(18) 1.2073(14) 0.8052(6) 0.054(4) Uani 1 1 d . . . 
H38A H 1.1690 1.2409 0.7824 0.065 Uiso 1 1 calc R . . 
C39 C 1.1042(14) 1.0820(14) 0.8136(5) 0.043(3) Uani 1 1 d . . . 
H39A H 1.1403 1.0273 0.7957 0.051 Uiso 1 1 calc R . . 
C40 C 1.0344(12) 1.0360(11) 0.8490(4) 0.029(2) Uani 1 1 d . . . 
C41 C 0.9270(13) 1.3102(12) 0.8986(4) 0.035(3) Uani 1 1 d . . . 
C42 C 1.0273(13) 0.9031(12) 0.8641(4) 0.031(3) Uani 1 1 d . . . 
C43 C 0.940(3) 0.600(2) 0.7328(9) 0.100(8) Uani 1 1 d . . . 
H43A H 0.9344 0.5494 0.7600 0.150 Uiso 1 1 calc R . . 
H43B H 1.0276 0.6162 0.7266 0.150 Uiso 1 1 calc R . . 
H43C H 0.8774 0.5534 0.7028 0.150 Uiso 1 1 calc R . . 
C44 C 0.912(3) 0.831(2) 0.7061(9) 0.124(11) Uani 1 1 d . . . 
H44A H 0.8926 0.9073 0.7201 0.186 Uiso 1 1 calc R . . 
H44B H 0.8469 0.7914 0.6758 0.186 Uiso 1 1 calc R . . 
H44C H 0.9978 0.8536 0.6984 0.186 Uiso 1 1 calc R . . 
 
loop_ 
 _atom_site_aniso_label 
 _atom_site_aniso_U_11 
 _atom_site_aniso_U_22 
 _atom_site_aniso_U_33 
 _atom_site_aniso_U_23 
 _atom_site_aniso_U_13 
 _atom_site_aniso_U_12 
Ce1 0.0241(3) 0.0286(4) 0.0269(3) 0.0017(3) 0.0077(2) 0.0103(3) 
Ce2 0.0258(3) 0.0305(4) 0.0258(3) 0.0032(3) 0.0076(3) 0.0122(3) 
Ce3 0.0349(4) 0.0377(4) 0.0233(3) 0.0033(3) 0.0079(3) 0.0116(3) 
Ce4 0.0292(3) 0.0250(4) 0.0265(3) 0.0040(2) 0.0075(3) 0.0116(3) 
Ce5 0.0305(3) 0.0242(3) 0.0263(3) 0.0049(2) 0.0095(3) 0.0115(3) 
S1 0.0231(12) 0.0269(14) 0.0343(15) 0.0008(11) 0.0091(11) 0.0094(11) 
S2 0.0298(13) 0.0247(14) 0.0319(15) 0.0072(11) 0.0105(12) 0.0097(11) 
O1 0.048(5) 0.033(5) 0.034(5) -0.003(4) 0.016(4) 0.012(4) 
O2 0.037(4) 0.037(5) 0.028(4) 0.008(3) 0.018(4) 0.019(4) 
O3 0.066(6) 0.043(5) 0.032(5) 0.010(4) 0.021(4) 0.028(5) 
O4 0.076(7) 0.055(6) 0.022(4) 0.011(4) 0.029(5) 0.020(5) 
O5 0.035(4) 0.037(5) 0.027(4) 0.006(4) 0.011(4) 0.009(4) 
O6 0.022(4) 0.034(5) 0.040(5) 0.016(4) 0.008(3) 0.008(3) 
O7 0.027(4) 0.051(6) 0.041(5) -0.011(4) 0.000(4) 0.006(4) 
O8 0.037(4) 0.035(5) 0.036(5) 0.000(4) 0.015(4) 0.018(4) 
O9 0.030(4) 0.033(5) 0.044(5) -0.007(4) 0.006(4) 0.013(4) 
O10 0.025(4) 0.060(6) 0.054(6) 0.005(5) 0.015(4) 0.010(4) 
O11 0.037(4) 0.027(4) 0.030(4) 0.001(3) 0.005(4) 0.013(4) 
O12 0.034(4) 0.035(5) 0.043(5) -0.011(4) 0.009(4) 0.017(4) 
O13 0.057(6) 0.051(6) 0.043(6) 0.007(5) -0.005(5) 0.024(5) 
O14 0.058(6) 0.041(5) 0.048(6) 0.014(4) 0.021(5) 0.024(5) 
O15 0.062(6) 0.040(6) 0.042(6) 0.001(4) 0.016(5) 0.014(5) 
O16 0.039(5) 0.026(5) 0.048(5) -0.009(4) 0.011(4) -0.001(4) 
O17 0.032(4) 0.058(6) 0.034(5) 0.007(4) 0.012(4) 0.011(4) 
O18 0.046(5) 0.031(5) 0.038(5) 0.004(4) 0.027(4) 0.010(4) 
O19 0.046(5) 0.077(8) 0.046(6) 0.028(5) 0.021(5) 0.032(5) 
O20 0.039(5) 0.043(5) 0.048(6) 0.003(4) -0.002(4) 0.013(4) 
O21 0.046(5) 0.049(6) 0.030(5) -0.011(4) 0.002(4) 0.011(5) 
O22 0.040(5) 0.057(6) 0.036(5) -0.009(4) 0.005(4) 0.020(5) 
O23 0.031(4) 0.035(5) 0.027(4) 0.003(3) 0.006(3) 0.010(4) 
O24 0.043(5) 0.046(5) 0.027(4) -0.004(4) 0.017(4) 0.014(4) 
O25 0.048(5) 0.031(5) 0.042(5) 0.009(4) 0.017(4) 0.016(4) 
O26 0.049(5) 0.021(4) 0.048(5) 0.005(4) 0.010(4) 0.012(4) 
O27 0.041(5) 0.030(4) 0.036(5) 0.010(4) 0.009(4) 0.019(4) 
O28 0.054(5) 0.033(5) 0.040(5) 0.006(4) 0.018(4) 0.024(4) 
O29 0.026(4) 0.028(4) 0.034(4) 0.005(3) 0.004(3) 0.011(3) 
O30 0.021(4) 0.039(5) 0.040(5) 0.012(4) -0.004(3) 0.012(3) 
O31 0.038(4) 0.034(5) 0.043(5) 0.010(4) 0.020(4) 0.019(4) 
O32 0.052(5) 0.037(5) 0.052(6) 0.020(4) 0.035(5) 0.014(4) 
O33 0.030(4) 0.049(6) 0.042(5) 0.001(4) 0.002(4) 0.015(4) 
O34 0.062(7) 0.060(8) 0.105(11) 0.020(7) 0.033(7) 0.000(6) 
O35 0.056(5) 0.034(5) 0.034(5) 0.014(4) 0.016(4) 0.018(4) 
N1 0.030(5) 0.031(5) 0.027(5) 0.010(4) 0.012(4) 0.010(4) 
N2 0.026(5) 0.031(5) 0.028(5) 0.007(4) 0.007(4) 0.011(4) 
N3 0.041(6) 0.037(6) 0.030(5) 0.003(4) 0.009(5) 0.014(5) 
N4 0.039(6) 0.035(6) 0.043(6) 0.004(5) 0.010(5) 0.011(5) 
N5 0.029(5) 0.031(5) 0.024(5) -0.005(4) -0.001(4) 0.004(4) 
N6 0.035(5) 0.027(5) 0.026(5) 0.002(4) 0.007(4) 0.016(4) 
C1 0.030(6) 0.025(6) 0.033(6) 0.000(5) 0.010(5) 0.007(5) 
C2 0.035(6) 0.034(7) 0.036(7) 0.000(5) 0.012(5) 0.009(5) 
C3 0.037(6) 0.042(7) 0.038(7) 0.008(6) 0.018(6) 0.015(6) 
C4 0.043(7) 0.030(6) 0.036(7) 0.011(5) 0.004(5) 0.012(5) 
C5 0.027(6) 0.053(8) 0.029(6) 0.002(6) 0.005(5) 0.014(6) 
C6 0.022(5) 0.033(6) 0.032(6) 0.008(5) 0.005(5) 0.005(5) 
C7 0.030(6) 0.043(7) 0.026(6) 0.001(5) 0.007(5) 0.012(5) 
C8 0.022(5) 0.046(7) 0.030(6) -0.001(5) 0.006(5) 0.010(5) 
C9 0.030(6) 0.072(11) 0.040(8) -0.015(7) 0.003(6) 0.013(7) 
C10 0.032(7) 0.071(11) 0.064(11) -0.028(9) -0.008(7) 0.008(7) 
C11 0.040(7) 0.062(10) 0.053(9) -0.011(7) 0.013(7) 0.019(7) 
C12 0.016(5) 0.042(7) 0.028(6) -0.006(5) 0.000(4) 0.011(5) 
C13 0.022(5) 0.038(7) 0.037(7) 0.015(5) 0.010(5) 0.012(5) 
C14 0.027(5) 0.037(7) 0.027(6) 0.010(5) 0.009(5) 0.016(5) 
C15 0.032(6) 0.039(7) 0.046(8) 0.006(6) 0.021(6) -0.001(5) 
C16 0.027(6) 0.050(8) 0.039(7) 0.009(6) 0.011(5) 0.011(6) 
C17 0.031(7) 0.077(11) 0.042(8) 0.007(7) 0.005(6) 0.015(7) 
C19 0.039(6) 0.024(6) 0.029(6) -0.005(5) 0.008(5) 0.003(5) 
C18 0.036(7) 0.057(9) 0.039(8) -0.012(7) -0.002(6) 0.004(7) 
C20 0.046(7) 0.049(8) 0.041(7) 0.025(6) 0.024(6) 0.027(6) 
C21 0.034(6) 0.037(7) 0.028(6) -0.002(5) 0.008(5) 0.007(5) 
C22 0.049(7) 0.024(6) 0.030(6) -0.006(5) 0.015(6) 0.003(5) 
C23 0.055(8) 0.042(8) 0.036(7) 0.013(6) 0.016(6) 0.005(7) 
C24 0.075(11) 0.052(9) 0.038(8) 0.025(7) 0.012(7) 0.011(8) 
C25 0.052(8) 0.040(8) 0.043(8) 0.014(6) -0.005(7) -0.006(7) 
C26 0.032(6) 0.034(7) 0.030(6) -0.009(5) -0.011(5) 0.008(5) 
C27 0.038(7) 0.030(7) 0.036(7) 0.001(5) 0.009(6) -0.001(5) 
C28 0.032(6) 0.035(7) 0.031(6) 0.004(5) 0.000(5) 0.016(5) 
C29 0.049(7) 0.027(6) 0.016(5) 0.001(4) 0.008(5) 0.018(5) 
C30 0.044(7) 0.060(9) 0.034(7) 0.011(6) 0.012(6) 0.014(7) 
C31 0.027(6) 0.047(8) 0.050(8) -0.003(6) 0.004(6) 0.016(6) 
C32 0.043(7) 0.047(8) 0.036(7) 0.007(6) 0.011(6) 0.020(6) 
C33 0.023(5) 0.030(6) 0.035(6) 0.000(5) 0.010(5) 0.001(5) 
C34 0.035(6) 0.031(7) 0.037(7) 0.002(5) 0.001(5) 0.006(5) 
C35 0.029(6) 0.029(6) 0.035(6) 0.012(5) 0.012(5) 0.005(5) 
C36 0.038(6) 0.020(5) 0.032(6) 0.003(5) 0.009(5) 0.012(5) 
C37 0.081(11) 0.032(7) 0.043(8) 0.010(6) 0.030(8) 0.009(7) 
C38 0.085(11) 0.039(8) 0.042(8) 0.010(6) 0.027(8) 0.013(8) 
C39 0.055(8) 0.047(8) 0.033(7) 0.010(6) 0.016(6) 0.020(7) 
C40 0.037(6) 0.030(6) 0.027(6) 0.000(5) 0.013(5) 0.017(5) 
C41 0.047(7) 0.032(7) 0.027(6) 0.016(5) 0.006(5) 0.010(6) 
C42 0.045(7) 0.031(6) 0.023(6) 0.003(5) 0.010(5) 0.017(5) 
C43 0.13(2) 0.085(16) 0.099(18) 0.006(13) 0.053(16) 0.026(15) 
C44 0.17(3) 0.095(18) 0.080(16) 0.042(14) 0.031(17) -0.023(18) 
 
_geom_special_details 
; 
 All esds (except the esd in the dihedral angle between two l.s. planes) 
 are estimated using the full covariance matrix.  The cell esds are taken 
 into account individually in the estimation of esds in distances, angles 
 and torsion angles; correlations between esds in cell parameters are only 
 used when they are defined by crystal symmetry.  An approximate (isotropic) 
 treatment of cell esds is used for estimating esds involving l.s. planes. 
; 
 
loop_ 
 _geom_bond_atom_site_label_1 
 _geom_bond_atom_site_label_2 
 _geom_bond_distance 
 _geom_bond_site_symmetry_2 
 _geom_bond_publ_flag 
Ce1 O10 2.435(9) 2_776 ? 
Ce1 O16 2.452(9) 2_666 ? 
Ce1 O8 2.457(8) 2_676 ? 
Ce1 O14 2.486(9) 2_676 ? 
Ce1 O12 2.552(9) 2_676 ? 
Ce1 O33 2.599(8) . ? 
Ce1 O1 2.652(9) . ? 
Ce1 O11 2.663(8) 2_676 ? 
Ce1 O2 2.683(8) . ? 
Ce1 C14 2.964(11) 2_676 ? 
Ce1 C6 2.977(11) . ? 
Ce2 O5 2.419(8) 2_676 ? 
Ce2 O3 2.441(9) . ? 
Ce2 O11 2.531(8) . ? 
Ce2 O2 2.543(8) . ? 
Ce2 O9 2.554(8) . ? 
Ce2 N1 2.577(10) . ? 
Ce2 O6 2.582(8) . ? 
Ce2 O5 2.617(8) . ? 
Ce2 N2 2.647(10) . ? 
Ce2 S1 3.220(3) . ? 
Ce3 O4 2.499(9) . ? 
Ce3 O21 2.505(9) . ? 
Ce3 O17 2.513(9) . ? 
Ce3 O13 2.514(9) . ? 
Ce3 O19 2.547(9) . ? 
Ce3 O15 2.562(10) . ? 
Ce3 N4 2.612(11) . ? 
Ce3 N3 2.651(11) . ? 
Ce3 O34 2.719(12) . ? 
Ce4 O29 2.437(8) 2_777 ? 
Ce4 O22 2.459(9) . ? 
Ce4 O23 2.535(8) . ? 
Ce4 O27 2.546(8) . ? 
Ce4 O25 2.555(8) . ? 
Ce4 O30 2.573(9) . ? 
Ce4 N5 2.585(10) . ? 
Ce4 O29 2.616(8) . ? 
Ce4 N6 2.638(10) . ? 
Ce4 S2 3.215(3) . ? 
Ce5 O26 2.431(9) 2_787 ? 
Ce5 O18 2.434(8) 2_677 ? 
Ce5 O31 2.443(8) 2_777 ? 
Ce5 O20 2.508(9) 2_777 ? 
Ce5 O35 2.597(8) . ? 
Ce5 O28 2.600(9) 2_777 ? 
Ce5 O27 2.649(8) 2_777 ? 
Ce5 O24 2.654(9) . ? 
Ce5 O23 2.664(8) . ? 
Ce5 C42 2.965(12) 2_777 ? 
Ce5 C35 2.977(12) . ? 
Ce5 H35B 1.9584 . ? 
S1 O7 1.461(9) . ? 
S1 O8 1.471(8) . ? 
S1 O6 1.476(8) . ? 
S1 O5 1.530(9) . ? 
S2 O32 1.439(9) . ? 
S2 O31 1.487(9) . ? 
S2 O30 1.489(8) . ? 
S2 O29 1.526(9) . ? 
O1 C6 1.244(15) . ? 
O2 C6 1.276(14) . ? 
O3 C7 1.252(15) . ? 
O4 C7 1.250(14) . ? 
O5 Ce2 2.419(8) 2_676 ? 
O8 Ce1 2.457(8) 2_676 ? 
O9 C13 1.263(15) . ? 
O10 C13 1.236(14) . ? 
O10 Ce1 2.435(9) 2_776 ? 
O11 C14 1.282(15) . ? 
O11 Ce1 2.663(8) 2_676 ? 
O12 C14 1.251(14) . ? 
O12 Ce1 2.552(9) 2_676 ? 
O13 C20 1.276(16) . ? 
O14 C20 1.277(15) . ? 
O14 Ce1 2.486(9) 2_676 ? 
O15 C21 1.268(15) . ? 
O16 C21 1.260(15) . ? 
O16 Ce1 2.452(9) 2_666 ? 
O17 C27 1.256(15) . ? 
O18 C27 1.263(15) . ? 
O18 Ce5 2.434(8) 2_677 ? 
O19 C28 1.260(15) . ? 
O20 C28 1.251(14) . ? 
O20 Ce5 2.508(9) 2_777 ? 
O21 C34 1.225(15) . ? 
O22 C34 1.286(16) . ? 
O23 C35 1.286(14) . ? 
O24 C35 1.251(15) . ? 
O25 C41 1.237(15) . ? 
O26 C41 1.236(14) . ? 
O26 Ce5 2.431(8) 2_787 ? 
O27 C42 1.297(15) . ? 
O27 Ce5 2.649(8) 2_777 ? 
O28 C42 1.228(14) . ? 
O28 Ce5 2.600(9) 2_777 ? 
O29 Ce4 2.437(8) 2_777 ? 
O31 Ce5 2.443(8) 2_777 ? 
O33 H33A 0.8501 . ? 
O33 H33B 0.8500 . ? 
O34 H34A 0.8500 . ? 
O34 H34B 0.8501 . ? 
O35 H35A 0.8500 . ? 
O35 H35B 0.8501 . ? 
N1 C5 1.332(15) . ? 
N1 C1 1.343(12) . ? 
N2 C8 1.329(14) . ? 
N2 C12 1.344(15) . ? 
N3 C19 1.335(16) . ? 
N3 C15 1.373(17) . ? 
N4 C26 1.354(16) . ? 
N4 C22 1.363(17) . ? 
N5 C33 1.336(16) . ? 
N5 C29 1.345(15) . ? 
N6 C36 1.325(14) . ? 
N6 C40 1.350(14) . ? 
N7 C43 1.53(2) . ? 
N7 C44 1.63(2) . ? 
N7 H7A 0.9000 . ? 
N7 H7B 0.9000 . ? 
C1 C2 1.4274 . ? 
C1 C6 1.510(13) . ? 
C2 C3 1.391(15) . ? 
C2 H2A 0.9300 . ? 
C3 C4 1.382(18) . ? 
C3 H3A 0.9300 . ? 
C4 C5 1.395(18) . ? 
C4 H4A 0.9300 . ? 
C5 C7 1.504(18) . ? 
C8 C9 1.386(18) . ? 
C8 C13 1.481(17) . ? 
C9 C10 1.35(2) . ? 
C9 H9A 0.9300 . ? 
C10 C11 1.43(2) . ? 
C10 H10A 0.9300 . ? 
C11 C12 1.346(19) . ? 
C11 H11A 0.9300 . ? 
C12 C14 1.505(14) . ? 
C14 Ce1 2.964(11) 2_676 ? 
C15 C16 1.409(18) . ? 
C15 C20 1.49(2) . ? 
C16 C17 1.42(2) . ? 
C16 H16A 0.9300 . ? 
C17 C18 1.40(2) . ? 
C17 H17A 0.9300 . ? 
C19 C18 1.416(17) . ? 
C19 C21 1.531(17) . ? 
C18 H18A 0.9300 . ? 
C22 C23 1.408(17) . ? 
C22 C27 1.510(19) . ? 
C23 C24 1.40(2) . ? 
C23 H23A 0.9300 . ? 
C24 C25 1.42(2) . ? 
C24 H24A 0.9300 . ? 
C25 C26 1.436(18) . ? 
C25 H25A 0.9300 . ? 
C26 C28 1.509(19) . ? 
C29 C30 1.406(18) . ? 
C29 C34 1.499(17) . ? 
C30 C31 1.411(19) . ? 
C30 H30A 0.9300 . ? 
C31 C32 1.429(18) . ? 
C31 H31A 0.9300 . ? 
C32 C33 1.399(17) . ? 
C32 H32A 0.9300 . ? 
C33 C35 1.508(16) . ? 
C36 C37 1.365(18) . ? 
C36 C41 1.518(18) . ? 
C37 C38 1.42(2) . ? 
C37 H37A 0.9300 . ? 
C38 C39 1.361(19) . ? 
C38 H38A 0.9300 . ? 
C39 C40 1.383(17) . ? 
C39 H39A 0.9300 . ? 
C40 C42 1.508(16) . ? 
C42 Ce5 2.965(12) 2_777 ? 
C43 H43A 0.9600 . ? 
C43 H43B 0.9600 . ? 
C43 H43C 0.9600 . ? 
C44 H44A 0.9600 . ? 
C44 H44B 0.9600 . ? 
C44 H44C 0.9600 . ? 
 
loop_ 
 _geom_angle_atom_site_label_1 
 _geom_angle_atom_site_label_2 
 _geom_angle_atom_site_label_3 
 _geom_angle 
 _geom_angle_site_symmetry_1 
 _geom_angle_site_symmetry_3 
 _geom_angle_publ_flag 
O10 Ce1 O16 79.7(3) 2_776 2_666 ? 
O10 Ce1 O8 82.7(3) 2_776 2_676 ? 
O16 Ce1 O8 162.4(3) 2_666 2_676 ? 
O10 Ce1 O14 71.1(3) 2_776 2_676 ? 
O16 Ce1 O14 96.0(3) 2_666 2_676 ? 
O8 Ce1 O14 78.3(3) 2_676 2_676 ? 
O10 Ce1 O12 137.4(3) 2_776 2_676 ? 
O16 Ce1 O12 72.6(3) 2_666 2_676 ? 
O8 Ce1 O12 121.9(3) 2_676 2_676 ? 
O14 Ce1 O12 80.1(3) 2_676 2_676 ? 
O10 Ce1 O33 71.4(3) 2_776 . ? 
O16 Ce1 O33 101.0(3) 2_666 . ? 
O8 Ce1 O33 73.1(3) 2_676 . ? 
O14 Ce1 O33 134.9(3) 2_676 . ? 
O12 Ce1 O33 144.8(3) 2_676 . ? 
O10 Ce1 O1 121.6(3) 2_776 . ? 
O16 Ce1 O1 68.9(3) 2_666 . ? 
O8 Ce1 O1 121.6(3) 2_676 . ? 
O14 Ce1 O1 155.9(3) 2_676 . ? 
O12 Ce1 O1 77.5(3) 2_676 . ? 
O33 Ce1 O1 68.2(3) . . ? 
O10 Ce1 O11 136.9(3) 2_776 2_676 ? 
O16 Ce1 O11 122.5(3) 2_666 2_676 ? 
O8 Ce1 O11 71.5(3) 2_676 2_676 ? 
O14 Ce1 O11 70.2(3) 2_676 2_676 ? 
O12 Ce1 O11 50.4(3) 2_676 2_676 ? 
O33 Ce1 O11 128.8(3) . 2_676 ? 
O1 Ce1 O11 101.4(3) . 2_676 ? 
O10 Ce1 O2 138.7(3) 2_776 . ? 
O16 Ce1 O2 117.1(3) 2_666 . ? 
O8 Ce1 O2 76.8(3) 2_676 . ? 
O14 Ce1 O2 136.4(3) 2_676 . ? 
O12 Ce1 O2 83.5(3) 2_676 . ? 
O33 Ce1 O2 68.5(3) . . ? 
O1 Ce1 O2 49.2(3) . . ? 
O11 Ce1 O2 68.2(2) 2_676 . ? 
O10 Ce1 C14 145.1(3) 2_776 2_676 ? 
O16 Ce1 C14 97.3(3) 2_666 2_676 ? 
O8 Ce1 C14 97.2(3) 2_676 2_676 ? 
O14 Ce1 C14 74.7(3) 2_676 2_676 ? 
O12 Ce1 C14 24.8(3) 2_676 2_676 ? 
O33 Ce1 C14 142.2(3) . 2_676 ? 
O1 Ce1 C14 88.4(3) . 2_676 ? 
O11 Ce1 C14 25.6(3) 2_676 2_676 ? 
O2 Ce1 C14 73.6(3) . 2_676 ? 
O10 Ce1 C6 130.0(3) 2_776 . ? 
O16 Ce1 C6 93.6(3) 2_666 . ? 
O8 Ce1 C6 97.7(3) 2_676 . ? 
O14 Ce1 C6 158.3(3) 2_676 . ? 
O12 Ce1 C6 84.2(3) 2_676 . ? 
O33 Ce1 C6 61.4(3) . . ? 
O1 Ce1 C6 24.7(3) . . ? 
O11 Ce1 C6 88.2(3) 2_676 . ? 
O2 Ce1 C6 25.4(3) . . ? 
C14 Ce1 C6 84.8(3) 2_676 . ? 
O5 Ce2 O3 151.4(3) 2_676 . ? 
O5 Ce2 O11 82.6(3) 2_676 . ? 
O3 Ce2 O11 80.3(3) . . ? 
O5 Ce2 O2 77.1(3) 2_676 . ? 
O3 Ce2 O2 125.2(3) . . ? 
O11 Ce2 O2 152.8(3) . . ? 
O5 Ce2 O9 81.1(3) 2_676 . ? 
O3 Ce2 O9 89.0(3) . . ? 
O11 Ce2 O9 122.4(3) . . ? 
O2 Ce2 O9 72.1(3) . . ? 
O5 Ce2 N1 136.2(3) 2_676 . ? 
O3 Ce2 N1 63.2(3) . . ? 
O11 Ce2 N1 141.1(3) . . ? 
O2 Ce2 N1 62.1(3) . . ? 
O9 Ce2 N1 72.2(3) . . ? 
O5 Ce2 O6 121.2(3) 2_676 . ? 
O3 Ce2 O6 75.7(3) . . ? 
O11 Ce2 O6 74.7(3) . . ? 
O2 Ce2 O6 100.8(3) . . ? 
O9 Ce2 O6 155.2(3) . . ? 
N1 Ce2 O6 83.5(3) . . ? 
O5 Ce2 O5 68.0(3) 2_676 . ? 
O3 Ce2 O5 128.0(3) . . ? 
O11 Ce2 O5 74.8(3) . . ? 
O2 Ce2 O5 80.9(3) . . ? 
O9 Ce2 O5 142.8(3) . . ? 
N1 Ce2 O5 117.0(3) . . ? 
O6 Ce2 O5 54.1(2) . . ? 
O5 Ce2 N2 75.9(3) 2_676 . ? 
O3 Ce2 N2 75.9(3) . . ? 
O11 Ce2 N2 61.4(3) . . ? 
O2 Ce2 N2 128.6(3) . . ? 
O9 Ce2 N2 61.1(3) . . ? 
N1 Ce2 N2 117.1(3) . . ? 
O6 Ce2 N2 130.6(3) . . ? 
O5 Ce2 N2 125.8(3) . . ? 
O5 Ce2 S1 94.6(2) 2_676 . ? 
O3 Ce2 S1 100.2(3) . . ? 
O11 Ce2 S1 68.4(2) . . ? 
O2 Ce2 S1 95.2(2) . . ? 
O9 Ce2 S1 167.2(2) . . ? 
N1 Ce2 S1 103.9(2) . . ? 
O6 Ce2 S1 26.68(17) . . ? 
O5 Ce2 S1 28.02(19) . . ? 
N2 Ce2 S1 129.6(2) . . ? 
O4 Ce3 O21 145.8(3) . . ? 
O4 Ce3 O17 142.8(3) . . ? 
O21 Ce3 O17 71.1(3) . . ? 
O4 Ce3 O13 98.1(3) . . ? 
O21 Ce3 O13 71.1(3) . . ? 
O17 Ce3 O13 90.2(3) . . ? 
O4 Ce3 O19 69.7(3) . . ? 
O21 Ce3 O19 96.7(3) . . ? 
O17 Ce3 O19 123.7(3) . . ? 
O13 Ce3 O19 138.8(4) . . ? 
O4 Ce3 O15 71.7(3) . . ? 
O21 Ce3 O15 141.7(3) . . ? 
O17 Ce3 O15 73.4(3) . . ? 
O13 Ce3 O15 123.2(3) . . ? 
O19 Ce3 O15 91.2(3) . . ? 
O4 Ce3 N4 120.0(3) . . ? 
O21 Ce3 N4 74.6(3) . . ? 
O17 Ce3 N4 62.6(3) . . ? 
O13 Ce3 N4 141.7(4) . . ? 
O19 Ce3 N4 61.3(3) . . ? 
O15 Ce3 N4 76.7(3) . . ? 
O4 Ce3 N3 77.0(3) . . ? 
O21 Ce3 N3 121.0(3) . . ? 
O17 Ce3 N3 75.2(3) . . ? 
O13 Ce3 N3 62.1(3) . . ? 
O19 Ce3 N3 142.3(3) . . ? 
O15 Ce3 N3 61.2(3) . . ? 
N4 Ce3 N3 127.1(3) . . ? 
O4 Ce3 O34 72.6(4) . . ? 
O21 Ce3 O34 73.2(4) . . ? 
O17 Ce3 O34 143.4(4) . . ? 
O13 Ce3 O34 70.6(4) . . ? 
O19 Ce3 O34 68.3(4) . . ? 
O15 Ce3 O34 143.2(4) . . ? 
N4 Ce3 O34 114.9(4) . . ? 
N3 Ce3 O34 118.0(4) . . ? 
O29 Ce4 O22 151.1(3) 2_777 . ? 
O29 Ce4 O23 76.7(3) 2_777 . ? 
O22 Ce4 O23 126.1(3) . . ? 
O29 Ce4 O27 81.6(3) 2_777 . ? 
O22 Ce4 O27 80.6(3) . . ? 
O23 Ce4 O27 151.9(3) . . ? 
O29 Ce4 O25 81.3(3) 2_777 . ? 
O22 Ce4 O25 89.2(3) . . ? 
O23 Ce4 O25 71.8(3) . . ? 
O27 Ce4 O25 122.4(3) . . ? 
O29 Ce4 O30 121.8(2) 2_777 . ? 
O22 Ce4 O30 74.7(3) . . ? 
O23 Ce4 O30 101.8(3) . . ? 
O27 Ce4 O30 74.7(3) . . ? 
O25 Ce4 O30 154.7(3) . . ? 
O29 Ce4 N5 136.6(3) 2_777 . ? 
O22 Ce4 N5 63.8(3) . . ? 
O23 Ce4 N5 62.5(3) . . ? 
O27 Ce4 N5 141.7(3) . . ? 
O25 Ce4 N5 73.0(3) . . ? 
O30 Ce4 N5 82.4(3) . . ? 
O29 Ce4 O29 68.4(3) 2_777 . ? 
O22 Ce4 O29 127.5(3) . . ? 
O23 Ce4 O29 80.5(3) . . ? 
O27 Ce4 O29 74.9(3) . . ? 
O25 Ce4 O29 142.9(3) . . ? 
O30 Ce4 O29 54.4(2) . . ? 
N5 Ce4 O29 115.4(3) . . ? 
O29 Ce4 N6 74.5(3) 2_777 . ? 
O22 Ce4 N6 77.0(3) . . ? 
O23 Ce4 N6 127.3(3) . . ? 
O27 Ce4 N6 61.5(3) . . ? 
O25 Ce4 N6 61.0(3) . . ? 
O30 Ce4 N6 130.9(3) . . ? 
N5 Ce4 N6 118.8(3) . . ? 
O29 Ce4 N6 125.8(3) . . ? 
O29 Ce4 S2 94.83(19) 2_777 . ? 
O22 Ce4 S2 99.7(3) . . ? 
O23 Ce4 S2 95.3(2) . . ? 
O27 Ce4 S2 68.70(19) . . ? 
O25 Ce4 S2 167.1(2) . . ? 
O30 Ce4 S2 27.02(17) . . ? 
N5 Ce4 S2 102.5(2) . . ? 
O29 Ce4 S2 28.00(19) . . ? 
N6 Ce4 S2 130.0(2) . . ? 
O26 Ce5 O18 78.3(3) 2_787 2_677 ? 
O26 Ce5 O31 83.9(3) 2_787 2_777 ? 
O18 Ce5 O31 162.2(3) 2_677 2_777 ? 
O26 Ce5 O20 71.1(3) 2_787 2_777 ? 
O18 Ce5 O20 94.2(3) 2_677 2_777 ? 
O31 Ce5 O20 79.1(3) 2_777 2_777 ? 
O26 Ce5 O35 71.6(3) 2_787 . ? 
O18 Ce5 O35 101.9(3) 2_677 . ? 
O31 Ce5 O35 72.8(3) 2_777 . ? 
O20 Ce5 O35 135.0(3) 2_777 . ? 
O26 Ce5 O28 134.5(3) 2_787 2_777 ? 
O18 Ce5 O28 71.4(3) 2_677 2_777 ? 
O31 Ce5 O28 122.4(3) 2_777 2_777 ? 
O20 Ce5 O28 78.1(3) 2_777 2_777 ? 
O35 Ce5 O28 146.9(3) . 2_777 ? 
O26 Ce5 O27 139.0(3) 2_787 2_777 ? 
O18 Ce5 O27 121.3(3) 2_677 2_777 ? 
O31 Ce5 O27 72.6(3) 2_777 2_777 ? 
O20 Ce5 O27 71.8(3) 2_777 2_777 ? 
O35 Ce5 O27 128.5(3) . 2_777 ? 
O28 Ce5 O27 50.2(3) 2_777 2_777 ? 
O26 Ce5 O24 120.5(3) 2_787 . ? 
O18 Ce5 O24 69.4(3) 2_677 . ? 
O31 Ce5 O24 121.7(3) 2_777 . ? 
O20 Ce5 O24 155.4(3) 2_777 . ? 
O35 Ce5 O24 68.3(3) . . ? 
O28 Ce5 O24 79.3(3) 2_777 . ? 
O27 Ce5 O24 100.5(3) 2_777 . ? 
O26 Ce5 O23 139.0(3) 2_787 . ? 
O18 Ce5 O23 118.0(3) 2_677 . ? 
O31 Ce5 O23 76.5(3) 2_777 . ? 
O20 Ce5 O23 137.1(3) 2_777 . ? 
O35 Ce5 O23 68.3(3) . . ? 
O28 Ce5 O23 85.9(3) 2_777 . ? 
O27 Ce5 O23 67.4(3) 2_777 . ? 
O24 Ce5 O23 49.7(3) . . ? 
O26 Ce5 C42 145.3(3) 2_787 2_777 ? 
O18 Ce5 C42 95.8(3) 2_677 2_777 ? 
O31 Ce5 C42 98.5(3) 2_777 2_777 ? 
O20 Ce5 C42 75.4(3) 2_777 2_777 ? 
O35 Ce5 C42 142.3(3) . 2_777 ? 
O28 Ce5 C42 24.4(3) 2_777 2_777 ? 
O27 Ce5 C42 25.9(3) 2_777 2_777 ? 
O24 Ce5 C42 87.8(3) . 2_777 ? 
O23 Ce5 C42 74.0(3) . 2_777 ? 
O26 Ce5 C35 129.9(3) 2_787 . ? 
O18 Ce5 C35 94.2(3) 2_677 . ? 
O31 Ce5 C35 97.8(3) 2_777 . ? 
O20 Ce5 C35 158.7(3) 2_777 . ? 
O35 Ce5 C35 61.6(3) . . ? 
O28 Ce5 C35 86.1(3) 2_777 . ? 
O27 Ce5 C35 87.1(3) 2_777 . ? 
O24 Ce5 C35 24.8(3) . . ? 
O23 Ce5 C35 25.6(3) . . ? 
C42 Ce5 C35 84.3(3) 2_777 . ? 
O26 Ce5 H35B 79.3 2_787 . ? 
O18 Ce5 H35B 92.2 2_677 . ? 
O31 Ce5 H35B 85.2 2_777 . ? 
O20 Ce5 H35B 147.7 2_777 . ? 
O35 Ce5 H35B 14.3 . . ? 
O28 Ce5 H35B 133.7 2_777 . ? 
O27 Ce5 H35B 129.6 2_777 . ? 
O24 Ce5 H35B 54.5 . . ? 
O23 Ce5 H35B 63.6 . . ? 
C42 Ce5 H35B 135.3 2_777 . ? 
C35 Ce5 H35B 51.2 . . ? 
O7 S1 O8 109.3(5) . . ? 
O7 S1 O6 114.2(6) . . ? 
O8 S1 O6 110.7(5) . . ? 
O7 S1 O5 110.7(5) . . ? 
O8 S1 O5 108.1(5) . . ? 
O6 S1 O5 103.7(5) . . ? 
O7 S1 Ce2 139.0(4) . . ? 
O8 S1 Ce2 111.5(4) . . ? 
O6 S1 Ce2 51.8(3) . . ? 
O5 S1 Ce2 53.5(3) . . ? 
O32 S2 O31 110.7(5) . . ? 
O32 S2 O30 113.4(5) . . ? 
O31 S2 O30 110.8(5) . . ? 
O32 S2 O29 109.8(6) . . ? 
O31 S2 O29 107.9(5) . . ? 
O30 S2 O29 103.9(5) . . ? 
O32 S2 Ce4 137.1(4) . . ? 
O31 S2 Ce4 112.1(3) . . ? 
O30 S2 Ce4 51.7(3) . . ? 
O29 S2 Ce4 53.6(3) . . ? 
C6 O1 Ce1 92.4(7) . . ? 
C6 O2 Ce2 125.5(7) . . ? 
C6 O2 Ce1 90.3(7) . . ? 
Ce2 O2 Ce1 138.3(3) . . ? 
C7 O3 Ce2 125.5(8) . . ? 
C7 O4 Ce3 128.1(9) . . ? 
S1 O5 Ce2 144.0(5) . 2_676 ? 
S1 O5 Ce2 98.5(4) . . ? 
Ce2 O5 Ce2 112.0(3) 2_676 . ? 
S1 O6 Ce2 101.5(4) . . ? 
S1 O8 Ce1 144.2(5) . 2_676 ? 
C13 O9 Ce2 125.1(7) . . ? 
C13 O10 Ce1 164.1(9) . 2_776 ? 
C14 O11 Ce2 125.7(7) . . ? 
C14 O11 Ce1 90.5(6) . 2_676 ? 
Ce2 O11 Ce1 142.4(3) . 2_676 ? 
C14 O12 Ce1 96.4(7) . 2_676 ? 
C20 O13 Ce3 125.7(9) . . ? 
C20 O14 Ce1 155.1(9) . 2_676 ? 
C21 O15 Ce3 126.2(8) . . ? 
C21 O16 Ce1 147.3(8) . 2_666 ? 
C27 O17 Ce3 125.3(8) . . ? 
C27 O18 Ce5 148.4(8) . 2_677 ? 
C28 O19 Ce3 127.4(8) . . ? 
C28 O20 Ce5 153.4(9) . 2_777 ? 
C34 O21 Ce3 132.0(9) . . ? 
C34 O22 Ce4 125.2(8) . . ? 
C35 O23 Ce4 124.4(7) . . ? 
C35 O23 Ce5 90.9(7) . . ? 
Ce4 O23 Ce5 139.3(3) . . ? 
C35 O24 Ce5 92.2(7) . . ? 
C41 O25 Ce4 125.9(8) . . ? 
C41 O26 Ce5 167.1(9) . 2_787 ? 
C42 O27 Ce4 126.5(7) . . ? 
C42 O27 Ce5 90.8(7) . 2_777 ? 
Ce4 O27 Ce5 141.9(3) . 2_777 ? 
C42 O28 Ce5 94.7(7) . 2_777 ? 
S2 O29 Ce4 144.0(5) . 2_777 ? 
S2 O29 Ce4 98.4(4) . . ? 
Ce4 O29 Ce4 111.6(3) 2_777 . ? 
S2 O30 Ce4 101.2(4) . . ? 
S2 O31 Ce5 143.4(5) . 2_777 ? 
Ce1 O33 H33A 99.7 . . ? 
Ce1 O33 H33B 93.2 . . ? 
H33A O33 H33B 107.7 . . ? 
Ce3 O34 H34A 100.9 . . ? 
Ce3 O34 H34B 97.2 . . ? 
H34A O34 H34B 107.7 . . ? 
Ce5 O35 H35A 102.6 . . ? 
Ce5 O35 H35B 34.7 . . ? 
H35A O35 H35B 107.7 . . ? 
C5 N1 C1 119.3(10) . . ? 
C5 N1 Ce2 119.4(8) . . ? 
C1 N1 Ce2 121.1(6) . . ? 
C8 N2 C12 118.5(10) . . ? 
C8 N2 Ce2 120.1(8) . . ? 
C12 N2 Ce2 121.3(7) . . ? 
C19 N3 C15 119.3(11) . . ? 
C19 N3 Ce3 121.0(8) . . ? 
C15 N3 Ce3 119.6(8) . . ? 
C26 N4 C22 120.5(12) . . ? 
C26 N4 Ce3 120.3(9) . . ? 
C22 N4 Ce3 119.1(8) . . ? 
C33 N5 C29 121.1(10) . . ? 
C33 N5 Ce4 121.0(7) . . ? 
C29 N5 Ce4 117.5(8) . . ? 
C36 N6 C40 118.2(10) . . ? 
C36 N6 Ce4 121.0(8) . . ? 
C40 N6 Ce4 120.7(7) . . ? 
C43 N7 C44 118.5(14) . . ? 
C43 N7 H7A 107.7 . . ? 
C44 N7 H7A 107.7 . . ? 
C43 N7 H7B 107.7 . . ? 
C44 N7 H7B 107.7 . . ? 
H7A N7 H7B 107.1 . . ? 
N1 C1 C2 121.9(5) . . ? 
N1 C1 C6 116.0(8) . . ? 
C2 C1 C6 122.0(6) . . ? 
C3 C2 C1 117.6(7) . . ? 
C3 C2 H2A 121.2 . . ? 
C1 C2 H2A 121.2 . . ? 
C4 C3 C2 119.5(11) . . ? 
C4 C3 H3A 120.3 . . ? 
C2 C3 H3A 120.3 . . ? 
C3 C4 C5 119.4(12) . . ? 
C3 C4 H4A 120.3 . . ? 
C5 C4 H4A 120.3 . . ? 
N1 C5 C4 122.2(12) . . ? 
N1 C5 C7 114.1(12) . . ? 
C4 C5 C7 123.7(12) . . ? 
O1 C6 O2 123.7(11) . . ? 
O1 C6 C1 121.2(10) . . ? 
O2 C6 C1 115.1(10) . . ? 
O1 C6 Ce1 62.9(6) . . ? 
O2 C6 Ce1 64.3(6) . . ? 
C1 C6 Ce1 160.0(7) . . ? 
O4 C7 O3 125.4(12) . . ? 
O4 C7 C5 117.2(12) . . ? 
O3 C7 C5 117.3(11) . . ? 
N2 C8 C9 121.7(12) . . ? 
N2 C8 C13 115.5(11) . . ? 
C9 C8 C13 122.7(11) . . ? 
C10 C9 C8 119.4(12) . . ? 
C10 C9 H9A 120.3 . . ? 
C8 C9 H9A 120.3 . . ? 
C9 C10 C11 119.6(14) . . ? 
C9 C10 H10A 120.2 . . ? 
C11 C10 H10A 120.2 . . ? 
C12 C11 C10 116.3(13) . . ? 
C12 C11 H11A 121.9 . . ? 
C10 C11 H11A 121.9 . . ? 
N2 C12 C11 124.5(11) . . ? 
N2 C12 C14 113.4(10) . . ? 
C11 C12 C14 122.0(11) . . ? 
O10 C13 O9 124.9(12) . . ? 
O10 C13 C8 117.7(12) . . ? 
O9 C13 C8 117.4(10) . . ? 
O12 C14 O11 122.6(10) . . ? 
O12 C14 C12 119.6(11) . . ? 
O11 C14 C12 117.7(10) . . ? 
O12 C14 Ce1 58.8(6) . 2_676 ? 
O11 C14 Ce1 63.9(6) . 2_676 ? 
C12 C14 Ce1 175.1(8) . 2_676 ? 
N3 C15 C16 122.7(12) . . ? 
N3 C15 C20 113.9(11) . . ? 
C16 C15 C20 123.3(13) . . ? 
C15 C16 C17 116.4(12) . . ? 
C15 C16 H16A 121.8 . . ? 
C17 C16 H16A 121.8 . . ? 
C18 C17 C16 121.0(13) . . ? 
C18 C17 H17A 119.5 . . ? 
C16 C17 H17A 119.5 . . ? 
N3 C19 C18 122.6(12) . . ? 
N3 C19 C21 115.0(10) . . ? 
C18 C19 C21 122.4(11) . . ? 
C17 C18 C19 117.8(14) . . ? 
C17 C18 H18A 121.1 . . ? 
C19 C18 H18A 121.1 . . ? 
O13 C20 O14 122.6(14) . . ? 
O13 C20 C15 118.6(11) . . ? 
O14 C20 C15 118.8(12) . . ? 
O16 C21 O15 125.6(12) . . ? 
O16 C21 C19 118.5(11) . . ? 
O15 C21 C19 115.9(11) . . ? 
N4 C22 C23 122.6(13) . . ? 
N4 C22 C27 114.9(11) . . ? 
C23 C22 C27 122.4(12) . . ? 
C24 C23 C22 116.9(13) . . ? 
C24 C23 H23A 121.5 . . ? 
C22 C23 H23A 121.5 . . ? 
C23 C24 C25 121.8(12) . . ? 
C23 C24 H24A 119.1 . . ? 
C25 C24 H24A 119.1 . . ? 
C24 C25 C26 117.1(14) . . ? 
C24 C25 H25A 121.5 . . ? 
C26 C25 H25A 121.5 . . ? 
N4 C26 C25 120.8(13) . . ? 
N4 C26 C28 116.0(11) . . ? 
C25 C26 C28 123.2(11) . . ? 
O17 C27 O18 125.3(12) . . ? 
O17 C27 C22 116.7(12) . . ? 
O18 C27 C22 117.7(11) . . ? 
O20 C28 O19 124.9(13) . . ? 
O20 C28 C26 120.5(11) . . ? 
O19 C28 C26 114.3(10) . . ? 
N5 C29 C30 122.3(11) . . ? 
N5 C29 C34 117.3(11) . . ? 
C30 C29 C34 120.4(11) . . ? 
C29 C30 C31 117.4(12) . . ? 
C29 C30 H30A 121.3 . . ? 
C31 C30 H30A 121.3 . . ? 
C30 C31 C32 119.5(12) . . ? 
C30 C31 H31A 120.3 . . ? 
C32 C31 H31A 120.3 . . ? 
C33 C32 C31 118.3(12) . . ? 
C33 C32 H32A 120.8 . . ? 
C31 C32 H32A 120.8 . . ? 
N5 C33 C32 121.4(11) . . ? 
N5 C33 C35 115.4(10) . . ? 
C32 C33 C35 123.2(11) . . ? 
O21 C34 O22 125.6(13) . . ? 
O21 C34 C29 119.6(12) . . ? 
O22 C34 C29 114.7(11) . . ? 
O24 C35 O23 123.5(11) . . ? 
O24 C35 C33 120.0(11) . . ? 
O23 C35 C33 116.3(11) . . ? 
O24 C35 Ce5 63.0(7) . . ? 
O23 C35 Ce5 63.5(6) . . ? 
C33 C35 Ce5 158.5(8) . . ? 
N6 C36 C37 123.0(12) . . ? 
N6 C36 C41 114.5(10) . . ? 
C37 C36 C41 122.5(11) . . ? 
C36 C37 C38 119.1(13) . . ? 
C36 C37 H37A 120.4 . . ? 
C38 C37 H37A 120.4 . . ? 
C39 C38 C37 117.6(14) . . ? 
C39 C38 H38A 121.2 . . ? 
C37 C38 H38A 121.2 . . ? 
C38 C39 C40 119.9(14) . . ? 
C38 C39 H39A 120.1 . . ? 
C40 C39 H39A 120.1 . . ? 
N6 C40 C39 122.1(11) . . ? 
N6 C40 C42 115.8(10) . . ? 
C39 C40 C42 121.9(11) . . ? 
O26 C41 O25 125.8(13) . . ? 
O26 C41 C36 117.0(11) . . ? 
O25 C41 C36 117.1(11) . . ? 
O28 C42 O27 123.6(11) . . ? 
O28 C42 C40 121.0(11) . . ? 
O27 C42 C40 115.4(10) . . ? 
O28 C42 Ce5 60.9(6) . 2_777 ? 
O27 C42 Ce5 63.3(6) . 2_777 ? 
C40 C42 Ce5 171.7(9) . 2_777 ? 
N7 C43 H43A 109.5 . . ? 
N7 C43 H43B 109.5 . . ? 
H43A C43 H43B 109.5 . . ? 
N7 C43 H43C 109.5 . . ? 
H43A C43 H43C 109.5 . . ? 
H43B C43 H43C 109.5 . . ? 
N7 C44 H44A 109.5 . . ? 
N7 C44 H44B 109.5 . . ? 
H44A C44 H44B 109.5 . . ? 
N7 C44 H44C 109.5 . . ? 
H44A C44 H44C 109.5 . . ? 
H44B C44 H44C 109.5 . . ? 
 
loop_ 
 _geom_hbond_atom_site_label_D 
 _geom_hbond_atom_site_label_H 
 _geom_hbond_atom_site_label_A 
 _geom_hbond_distance_DH 
 _geom_hbond_distance_HA 
 _geom_hbond_distance_DA 
 _geom_hbond_angle_DHA 
 _geom_hbond_site_symmetry_A 
O33 H33A O9  0.85 2.10 2.902(13) 156.6 . 
O34 H34B O22  0.85 2.27 3.061(17) 155.1 . 
O35 H35A O25  0.85 2.02 2.868(13) 171.6 . 
O35 H35B O24  0.85 2.20 2.947(13) 146.7 . 
N7 H7A O28  0.90 1.98 2.870(12) 168.9 . 
N7 H7B O19  0.90 1.94 2.813(13) 164.3 . 
 
_diffrn_measured_fraction_theta_max    0.957 
_diffrn_reflns_theta_full              27.46 
_diffrn_measured_fraction_theta_full   0.957 
_refine_diff_density_max    3.983 
_refine_diff_density_min   -3.076 
_refine_diff_density_rms    0.462 
